# Supplementary material
Source: Springer Nature journal article supplement (https://www.springermedizin.de/resource/supplementary/13049_2013_828_MOESM4_ESM.pdf/9667242)

Numbers **■** Hypothermia (n=243) **▨** Frostbite (n=105) **▤** Drowning (n=56)

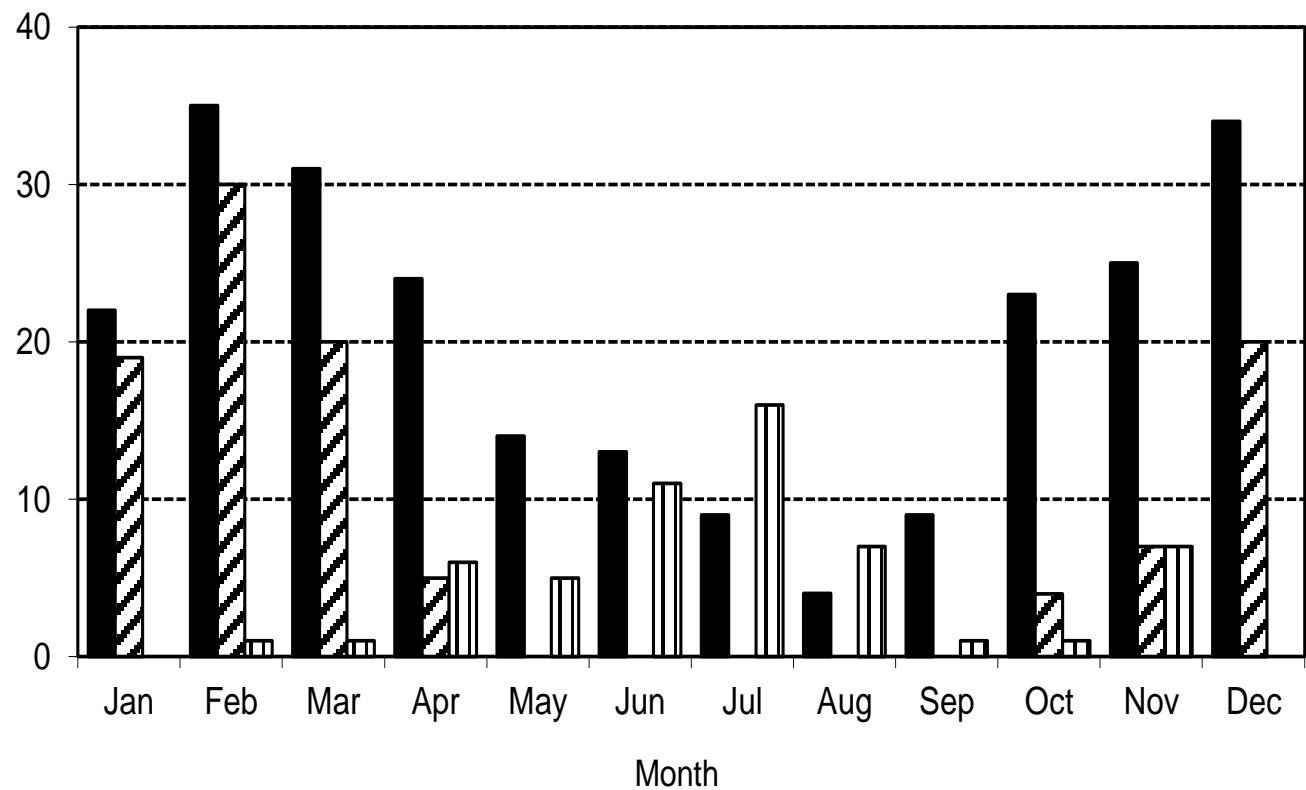

Supplement: MOESM4 [file 9667242]
